# Supplementary material
Source: MDPI journal article supplement (https://www.mdpi.com/2036-7481/15/2/49)
Supplement: s1 [file s1]

## Supplementary Table S1 to Table S4

**Table S1. The information on the reference strains of CCoV**

| Isolate            | Accession No. | Country         | Collection Date | Submission Date | Genotype |
|--------------------|---------------|-----------------|-----------------|-----------------|----------|
| 12/20              | OX335549.1    | United Kingdom  | /               | 13-SEP-2022     | I        |
| 62/22              | OX335548.1    | United Kingdom  | /               | 13-SEP-2022     | I        |
| 59/22              | OX335546.1    | United Kingdom  | /               | 13-SEP-2022     | I        |
| 10/22              | OX335534.1    | United Kingdom  | /               | 13-SEP-2022     | I        |
| 46/22              | OX335530.1    | United Kingdom  | /               | 13-SEP-2022     | I        |
| 38/22              | OX335545.1    | United Kingdom  | /               | 13-SEP-2022     | I        |
| 13/22              | OX335535.1    | United Kingdom  | /               | 13-SEP-2022     | I        |
| 450/07             | GU146061.1    | Italy           | Oct-2007        | 30-OCT-2009     | IIb      |
| 66/09AY390344      | HQ450376.1    | Greece          | 2009            | 28-OCT-2010     | IIb      |
| CCoV/7/2020/AUS    | MW383487.1    | Australia       | 12-Mar-2020     | 6-DEC-2020      | IIb      |
| 174/06             | EU856362.1    | Italy           | Mar-2006        | 27-JUN-2008     | IIb      |
| 341/05             | EU856361.1    | Italy           | Dec-2005        | 27-JUN-2008     | IIb      |
| 119/08             | EU924791.1    | Italy           | Mar-2008        | 25-JUL-2008     | IIb      |
| Z19                | MZ420153.1    | Haiti           | 15-Mar-2017     | 18-JUN-2021     | IIb      |
| CoV/dog/HCM47/2015 | LC190907.1    | Viet Nam        | 2015-06         | 11-OCT-2016     | IIb      |
| CB/05              | KP981644.1    | Italy           | 2005            | 16-MAR-2015     | IIa      |
| NA/09              | JF682842.1    | Greece          | 2009            | 13-MAR-2011     | IIa      |
| JS2103             | OM055788.1    | China           | 10-Mar-2021     | 28-DEC-2021     | IIa      |
| S378               | KC175341.1    | USA: Ithaca, NY | 1978            | 15-NOV-2012     | IIa      |
| 1-71               | JQ404409.1    | USA             | /               | 11-JAN-2012     | IIa      |
| HC2                | AY884048.1    | China           | /               | 11-JAN-2005     | IIa      |
| SH32_2001          | MF095847.1    | Tanzania        | 2001            | 11-MAY-2017     | IIa      |
| fc1                | AB781790.1    | Japan           | /               | 07-FEB-2013     | IIa      |
| 04-0709            | FJ009114.1    | United Kingdom  | /               | 11-AUG-2008     | IIa      |
| B639_ZJ_2019       | MT114538.1    | China           | 19-Sep-2019     | 25-FEB-2020     | IIa      |
| CCoV/GD/2020/X9    | MZ320954.1    | China           | Feb-2020        | 31-MAY-2021     | IIa      |
| GH8-2              | OM950728.1    | China           | 2020            | 08-MAR-2022     | IIa      |
| UPPS2/04           | DQ431019.1    | Sweden          | /               | 03-MAR-2006     | IIa      |
| NS-28              | MT136074.1    | China           | 09-Mar-2018     | 02-MAR-2020     | IIa      |
| A76                | JN856008.1    | USA: Ithaca, NY | 1976            | 16-NOV-2012     | IIa      |
| 2020/7             | MT906865.1    | United Kingdom  | 2020            | 20-AUG-2020     | IIa      |
| 742                | KF308994.1    | Brazil          | 2006            | 01-JUL-2013     | IIa      |
| CD25_21032412      | OQ623725.1    | China           | 24-Mar-2021     | 12-MAR-2023     | IIa      |
| JS1706             | MN078152.1    | China: Jiangsu  | 2017            | 17-JUN-2019     | IIa      |
| CCoV/GY0608        | MW718811.1    | China           | 2020            | 05-MAR-2021     | IIa      |
| 859                | KF308995.1    | Brazil          | 2007            | 01-JUL-2013     | IIa      |

**Table S2. The information on the reference strains of CRV**

| Isolate  | Accession No. | Country  | Collection Date | Submission Date | Genotype |
|----------|---------------|----------|-----------------|-----------------|----------|
| B1-R5    | MW254133.1    | China    | 2019            | 10-NOV-2020     | G3       |
| B8-R6    | MW254143.1    | China    | 2019            | 10-NOV-2020     | G3       |
| B12-R4   | MW254137.1    | China    | 2019            | 10-NOV-2020     | G3       |
| SD-MO5   | OM450983.1    | China    | 2021            | 27-JAN-2022     | G3       |
| B5-R3    | MW254141.1    | China    | 2021            | 27-JAN-2022     | G3       |
| B11-R3   | MW254136.1    | China    | 2019            | 10-NOV-2020     | G3       |
| B4-R3    | MW254139.1    | China    | 2019            | 10-NOV-2020     | G3       |
| B8-R2    | MW254140.1    | China    | 2019            | 10-NOV-2020     | G3       |
| B12-R1   | MW254142.1    | China    | 2019            | 10-NOV-2020     | G3       |
| B1-R2    | MW254145.1    | China    | 2019            | 10-NOV-2020     | G3       |
| B7-R2    | MW254144.1    | China    | 2019            | 10-NOV-2020     | G3       |
| B3-R2    | MW24146.1     | China    | 2019            | 10-NOV-2020     | G3       |
| CU128    | MT364840.1    | Thailand | 2017            | 21-APR-2020     | G3P [3]  |
| CU132    | MT364851.1    | Thailand | 2017            | 21-APR-2020     | G3P [3]  |
| CU23379  | MT364873.1    | Thailand | 2019            | 21-APR-2020     | G3P [3]  |
| WH       | OL388441.1    | China    | 26-Oct-2020     | 05-NOV-2021     | G3P [3]  |
| CU126    | MT364829.1    | Thailand | 2017            | 21-APR-2020     | G3P [3]  |
| 12638    | LC340021.1    | Japan    | 2014            | 29-NOV-2017     | G3P [3]  |
| IAL-M202 | ON464739.1    | Brazil   | 2017            | 09-MAY-2022     | G3P [3]  |
| IAL-M414 | ON464741.1    | Brazil   | 2017            | 09-MAY-2022     | G3P [3]  |
| CAN2060  | ON015838.1    | Brazil   | 2020            | 17-MAR-2022     | G3P [3]  |
| CAN2059  | ON015837.1    | Brazil   | 2020            | 17-MAR-2022     | G3P [3]  |

**Table S3. The information on the reference strains of CPV**

| Isolate                                | Accession No. | Country         | Collection Date | Submission Date | Genotype |
|----------------------------------------|---------------|-----------------|-----------------|-----------------|----------|
| CVASU parvovirus1                      | MT629886.1    | Bangladesh      | 19-Jun-2018     | 15-JUN-2020     | 2a       |
| LN1-2020                               | OM964631.1    | China: Liaoning | Aug-2020        | 09-MAR-2022     | 2a       |
| Sho-nan                                | AB128923.1    | Japan           | /               | 10-DEC-2003     | 2a       |
| HN1                                    | MK357733.1    | Viet Nam        | Nov-201         | 02-JAN-2019     | 2a       |
| BJ-1                                   | MN101726.1    | China: Beijing  | Mar-2018        | 25-JUN-2019     | 2a       |
| Roseworthy/SA/5371/2019                | MZ362882.1    | Australia       | 2019            | 01-JUN-2021     | 2a       |
| Dalmatian_ANDIV/New<br>CPV-2a/2017/Ind | MT920963.1    | India           | 2017            | 22-AUG-2020     | 2a       |
| EC/01/2017                             | MG264075.1    | Ecuador         | 06-Jun-2017     | 24-OCT-2017     | 2a       |
| 04S33                                  | DQ026002.1    | France          | /               | 03-MAY-2005     | 2a       |
| CPV-2a/Erbil2/2016                     | OL546621.1    | Iraq            | Feb-2016        | 14-NOV-2021     | 2a       |
| HLJ/01                                 | KM386821.1    | China           | 01-Jun-2014     | 21-AUG-2014     | 2a       |
| DH426                                  | EF599096.1    | South Korea     | /               | 08-MAY-2007     | 2a       |
| T25                                    | U72697.1      | Taiwan          | /               | 27-SEP-199      | 2a       |
| CPV-                                   | OP208806.1    | China           | 2020            | 10-AUG-2022     | 2a       |

|                                 |              |                       |             |             |    |
|---------------------------------|--------------|-----------------------|-------------|-------------|----|
| 2a/pangolin/China/P2/20         |              |                       |             |             |    |
| 3216                            | MW380186.1   | India: Uttarakhand    | 2014        | 17-DEC-2020 | 2a |
| EC/24/2017                      | MG264078.1   | Ecuador               | 06-Jun-2017 | 24-OCT-2017 | 2b |
| CPV-gd7                         | KM386954.1   | China: Zhejiang       | 2014        | 22-AUG-2014 | 2b |
| 2b_ME20_ECU2012                 | KF149985.1   | Ecuador               | 2012        | 26-MAY-2013 | 2b |
| CPV-2b/Sul2/2016                | OL546610.1   | Iraq                  | Aug-2016    | 14-NOV-2021 | 2b |
| HNI-1-18                        | AB120728.1   | Japan                 | /           | 22-SEP-2003 | 2b |
| Arg5                            | JF414817.1.1 | Argentina: San Isidro | 01-Oct-2003 | 21-FEB-2011 | 2b |
| Taichung                        | AY869724.1   | China: Taiwan         | /           | 28-DEC-2004 | 2b |
| CPV-2b-wuhan2                   | KC881278.1   | China                 | 2010        | 10-APR-2013 | 2b |
| 9985-46                         | LC270892.1   | Japan: Kyoto          | /           | 18-MAY-2017 | 2b |
| HN-3                            | DQ177497.1   | China                 | /           | 20-AUG-2005 | 2b |
| CPV2b-LIVA-UFOV2_2019           | OL373925.1   | Brazil                | 22-Oct-2019 | 3-NOV-2021  | 2b |
| 3634                            | MW380200.1   | India: Uttarakhand    | 2009        | 17-DEC-2020 | 2b |
| nn168113                        | MK332000.1   | China                 | 13-Aug-201  | 19-DEC-2018 | 2c |
| guangzhou/QH3/2018              | MT488458.1   | China                 | 2018        | 16-MAY-2020 | 2c |
| 2c_ME28_ECU20                   | KF149984.1   | Ecuador               | 2012        | 26-MAY-2013 | 2c |
| CPV-2c/Sul7/2017                | OL546613.1   | Iraq                  | Jul-2017    | 14-NOV-2021 | 2c |
| LCPV V139                       | AB054222.2   | Japan                 | /           | 16-JAN-2001 | 2c |
| W25                             | OM523077.1   | China                 | 2021        | 04-FEB-2022 | 2c |
| CPV_ISSSI_52238_1               | KX434460.1   | Italy                 | 02-Oct-2012 | 22-JUN-2016 | 2c |
| NIG/2021/265.21-88              | ON063561.1   | Nigeria               | 2021        | 22-MAR-2022 | 2c |
| DPHSAUBD11N001                  | ON256217.1   | Bangladesh            | 19-Nov-2020 | 16-APR-2022 | 2c |
| CADRAD-IVRI_569CAD2c_India/2021 | MZ223471.1   | India                 | 2021        | 17-MAY-2021 | 2c |

**Table S4. The information on the reference strains of CDV**

| Isolate                  | Accession No. | Country       | Collection Date | Submission Date | Genotype |
|--------------------------|---------------|---------------|-----------------|-----------------|----------|
| PS                       | JN896331.1    | China         | 2010            | 25-OCT-2011     | Asia-1   |
| CDV6_TH/2014             | MH496779.1    | Thailand      | 2014            | 15-JUN-2018     | Asia-1   |
| CDV7_TH/2014             | MH496776.1    | Thailand      | 2014            | 15-JUN-2018     | Asia-1   |
| CDV-RD-JL                | KJ848781.1    | China         | Apr-2014        | 15-MAY-2014     | Asia-1   |
| Louguantai 1             | KP677502.1    | China: Xian   | 04-Jan-2015     | 20-JAN-2015     | Asia-1   |
| giant panda/SX/2014      | KP793921.1    | China: Shanxi | 2014            | 13-FEB-2015     | Asia-1   |
| Asia-1/Canine/NTU 2005-1 | MK431532.1    | Taiwan        | Mar-2005        | 23-JAN-2019     | Asia-1   |
| BT                       | MW713449.1    | China: Jilin  | 2019            | 05-MAR-2021     | Asia-1   |
| HLJ21-10                 | ON206669.1    | China         | Oct-2021        | 08-APR-2022     | Asia-1   |

|                       |            |                     |             |             |        |
|-----------------------|------------|---------------------|-------------|-------------|--------|
| CDV-ZC                | KJ994343.1 | China               | Oct-2013    | 11-JUN-2014 | Asia-1 |
| CDV SY                | KJ466106.1 | China               | 2012        | 17-FEB-2014 | /      |
| CDV/dog/HCM/33/140816 | LC159587.1 | Viet Nam            | 2014-08-16  | 14-JUN-2016 | /      |
| GS0904-8              | HM623892.1 | China: Gansu        | Apr-2009    | 01-JUL-2010 | /      |
| HD                    | EU409838.1 | China               | /           | 16-JAN-2008 | /      |
| NT                    | OL675426.1 | China               | 09-Aug-2020 | 22-NOV-2021 | /      |
| GS0812-4              | HQ850146.1 | China: Gansu        | Dec-2008    | 28-DEC-2010 | /      |
| LN (10)1              | KP765464.1 | China: Liaoning     | 2010        | 10-FEB-2015 | /      |
| Kaohsiung             | DQ522030.1 | China: Taiwan       | /           | 01-MAY-2006 | /      |
| GZ0803                | KC590511.1 | China:<br>Guangzhou | 28-Nov-2012 | 07-FEB-2013 | /      |
| NJ01                  | JF965338.1 | China               | May-2011    | 16-MAY-2011 | /      |
| BJ16B53               | MF926600.1 | China               | Sep-2016    | 07-SEP-2017 | /      |
| SDZC (17)M2           | MK408454.1 | China:<br>Shandong  | Jun-2017    | 14-JAN-2019 | /      |
| GS0812-7              | HQ850150.1 | China: Gansu        | Dec-2008    | 28-DEC-2010 | /      |
| SD16F                 | MH337872.1 | China               | Jul-2016    | 11-MAY-2018 | /      |
| SD16F-P35             | OQ448874.1 | China               | Sep-2022    | 16-FEB-2023 | /      |
| 01-2689               | AY649446.1 | USA                 | /           | 09-JUN-2004 | /      |
| SDWD (14)9            | KU552083.1 | China               | May-2014    | 18-JAN-2016 | /      |
| A75/17                | AF164967.1 | Switzerland         | /           | 02-JUL-1999 | /      |
| DL1                   | KM386684.1 | China               | Oct-2013    | 21-AUG-2014 | /      |
| vaccine X             | EU072200.1 | Hungary             | 2006        | 30-JUL-2007 | /      |
| Ohio R252             | KF640687.1 | USA: Ohio           | /           | 06-SEP-2013 | /      |
| ZD01                  | EF445050.1 | China               | /           | 19-FEB-2007 | /      |
| PLE806                | MT932504.1 | USA                 | 01-Sep-1992 | 26-AUG-2020 | /      |
| HLJ2-07               | HQ540292.1 | China               | 2007        | 03-NOV-2010 | /      |
| GS20-11               | MW600730.1 | China               | 10-Dec-2020 | 14-FEB-2021 | /      |
| GS20-11               | MW600730.1 | China               | 10-Dec-2020 | 14-FEB-2021 | /      |
| ZYL                   | KX499865.1 | China               | 2015        | 01-JUL-2016 | /      |
| SH202003              | MW239877.1 | China               | 28-Aug-2020 | 09-NOV-2020 | /      |
| GS0903-4              | HM596311.1 | China: Gansu        | Mar-2009    | 29-JUN-2010 | /      |
| MS01                  | DQ887066.1 | China               | /           | 07-AUG-2006 | /      |
| PS-N                  | JX276747.1 | China               | 06-Jul-2009 | 05-JUL-2012 | /      |
| SD(14)11              | KP738610.1 | China               | 01-Oct-2014 | 30-JAN-2015 | /      |
| 98-2646               | AY542312.2 | USA                 | /           | 24-JUN-2004 | /      |
